# Supplementary material for: Estimating recent migration and population-size surfaces
Source: PubMed Central journal article supplement (PMC6347299; doi:10.1371/journal.pgen.1007908), 2019-01-14

(a) Simulation

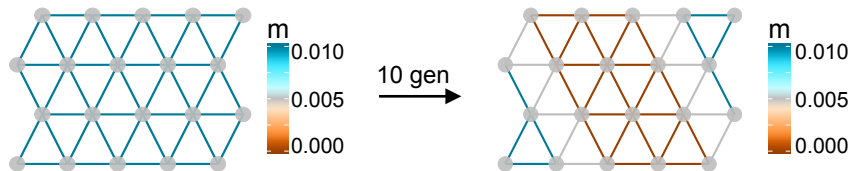

(b) Inference

MAPS 2-4 cM

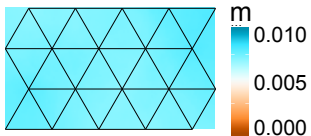

MAPS 2-6 cM

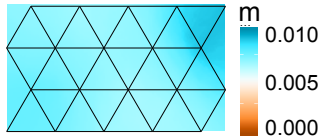

MAPS 2-8 cM

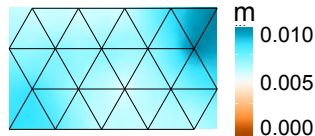

MAPS >4 cM

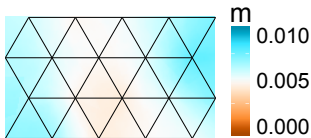

MAPS >6 cM

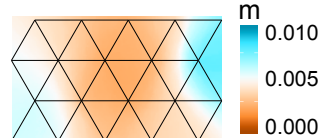

MAPS >8 cM

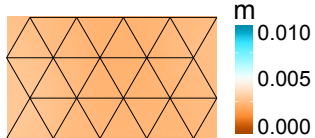

Supplement: pgen.1007908.s002.pdf [file pgen.1007908.s002.pdf]
