# Supplementary material for: Estimating recent migration and population-size surfaces
Source: PubMed Central journal article supplement (PMC6347299; doi:10.1371/journal.pgen.1007908), 2019-01-14

Simulation

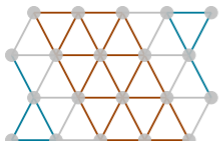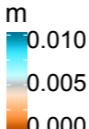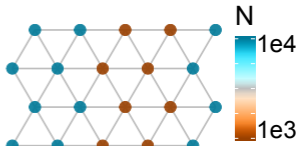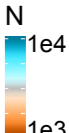

MAPS > 2 cm

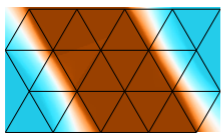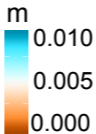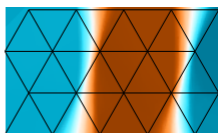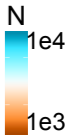

Supplement: pgen.1007908.s004.pdf [file pgen.1007908.s004.pdf]
