# Supplementary material for: Estimating recent migration and population-size surfaces
Source: PubMed Central journal article supplement (PMC6347299; doi:10.1371/journal.pgen.1007908), 2019-01-14

a) Estimated population sizes under single deme model

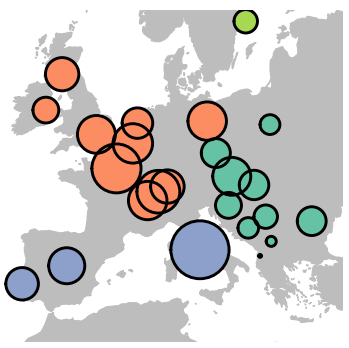

b) United Kingdom

Sweden

France

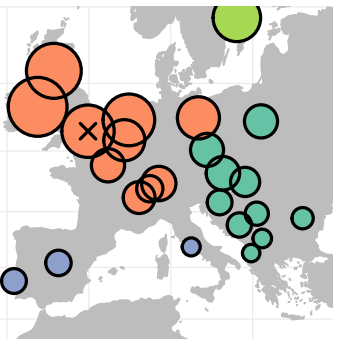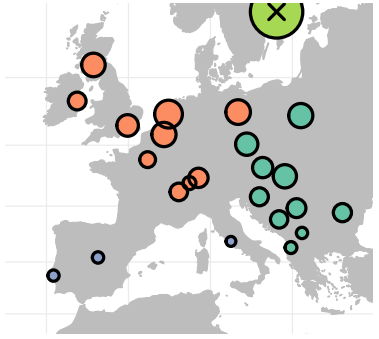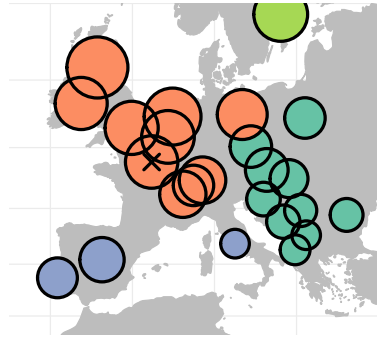

Netherlands

Germany

French-speaking Swiss

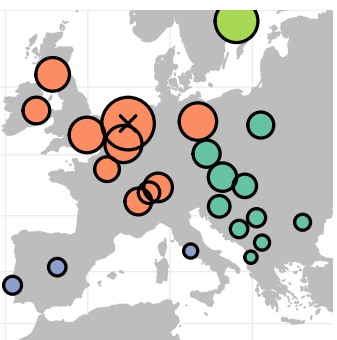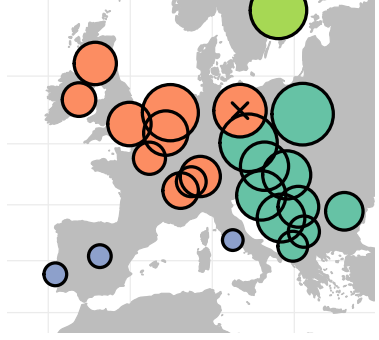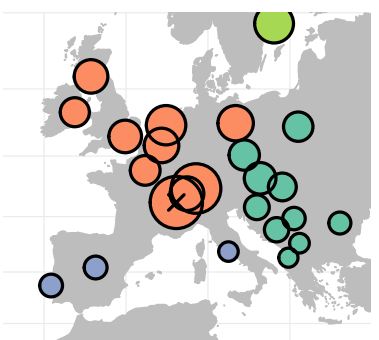

German-speaking Swiss

Italy

Poland

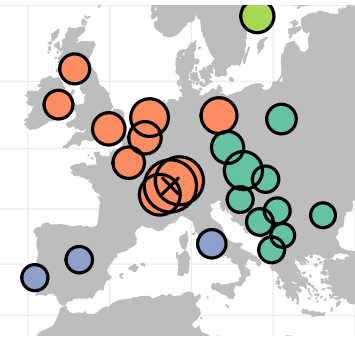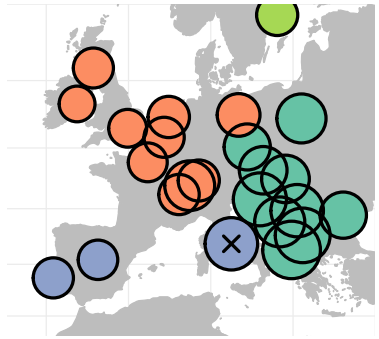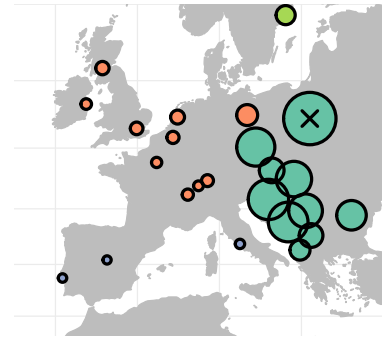

Supplement: pgen.1007908.s005.pdf [file pgen.1007908.s005.pdf]
