# Supplementary material for: Estimating recent migration and population-size surfaces
Source: PubMed Central journal article supplement (PMC6347299; doi:10.1371/journal.pgen.1007908), 2019-01-14

a)

1-5cM (~2700 years)

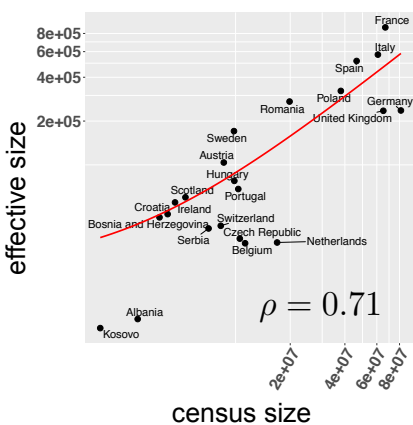

b)

5-10cM (~675 years)

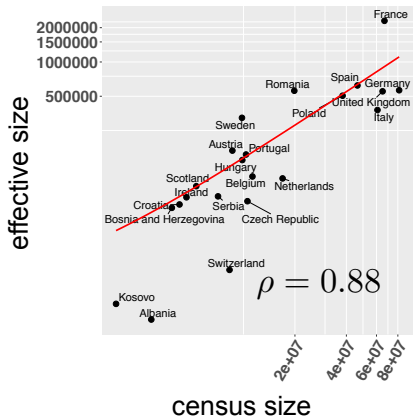

c)

&gt;10cM (~225 years)

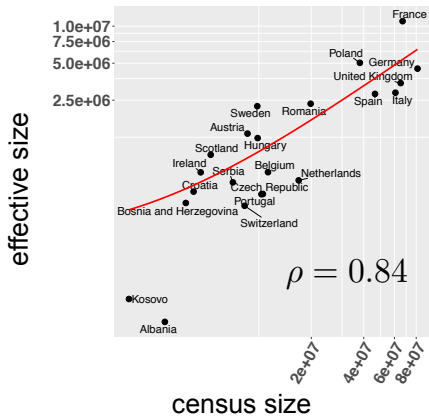

Supplement: pgen.1007908.s006.pdf [file pgen.1007908.s006.pdf]
