# Supplementary material for: Estimating recent migration and population-size surfaces
Source: PubMed Central journal article supplement (PMC6347299; doi:10.1371/journal.pgen.1007908), 2019-01-14

**a)**

5-10cM vs 1-5cM

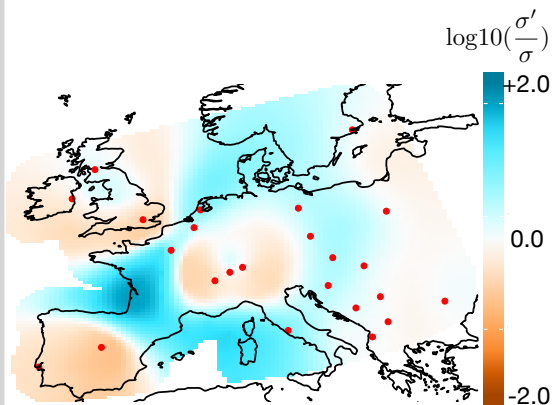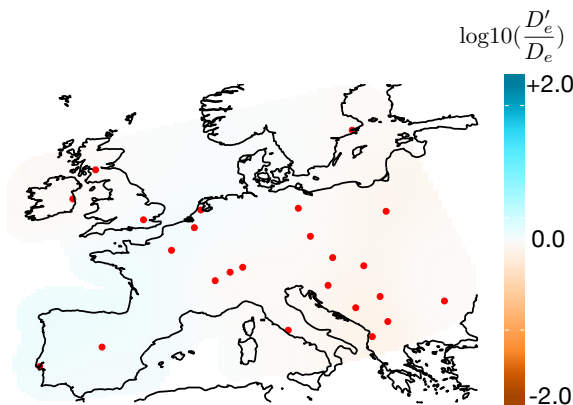**b)**

&gt;10cM vs 5-10cM

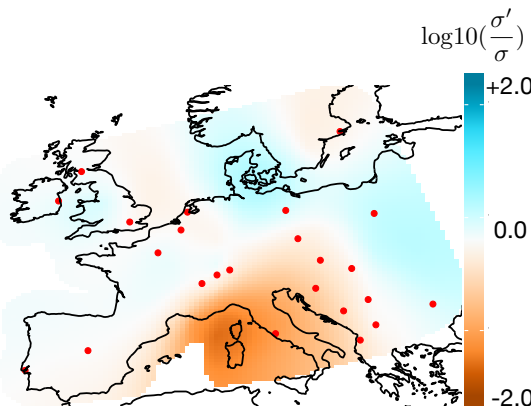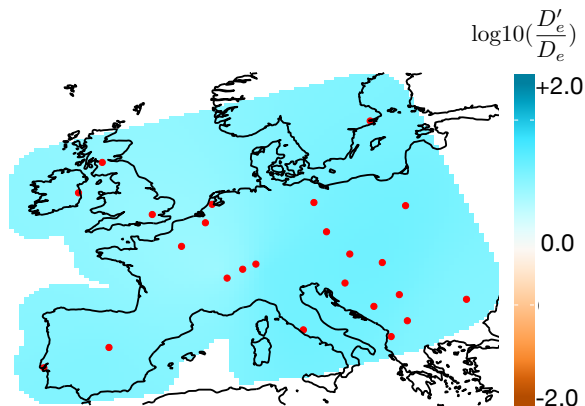

Supplement: pgen.1007908.s007.pdf [file pgen.1007908.s007.pdf]
