# Supplementary material for: Estimating recent migration and population-size surfaces
Source: PubMed Central journal article supplement (PMC6347299; doi:10.1371/journal.pgen.1007908), 2019-01-14

(a)

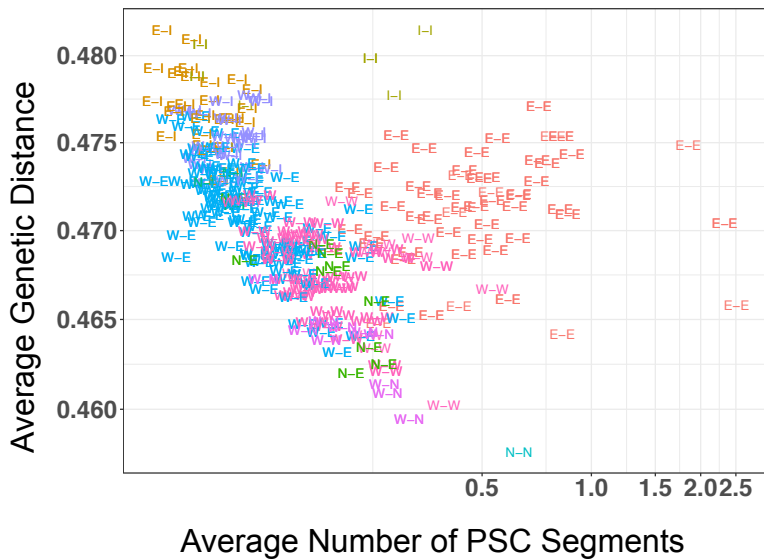

(b)

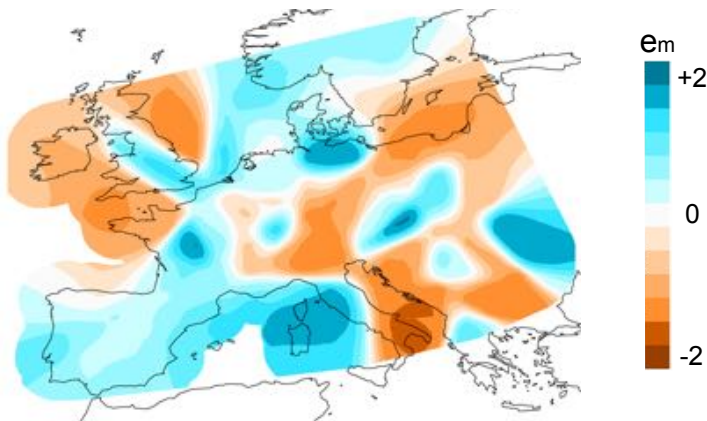

Supplement: pgen.1007908.s009.pdf [file pgen.1007908.s009.pdf]
